# Supplementary material
Source: PubMed Central journal article supplement (PMC4894540)

# Biological Process Term Enrichment

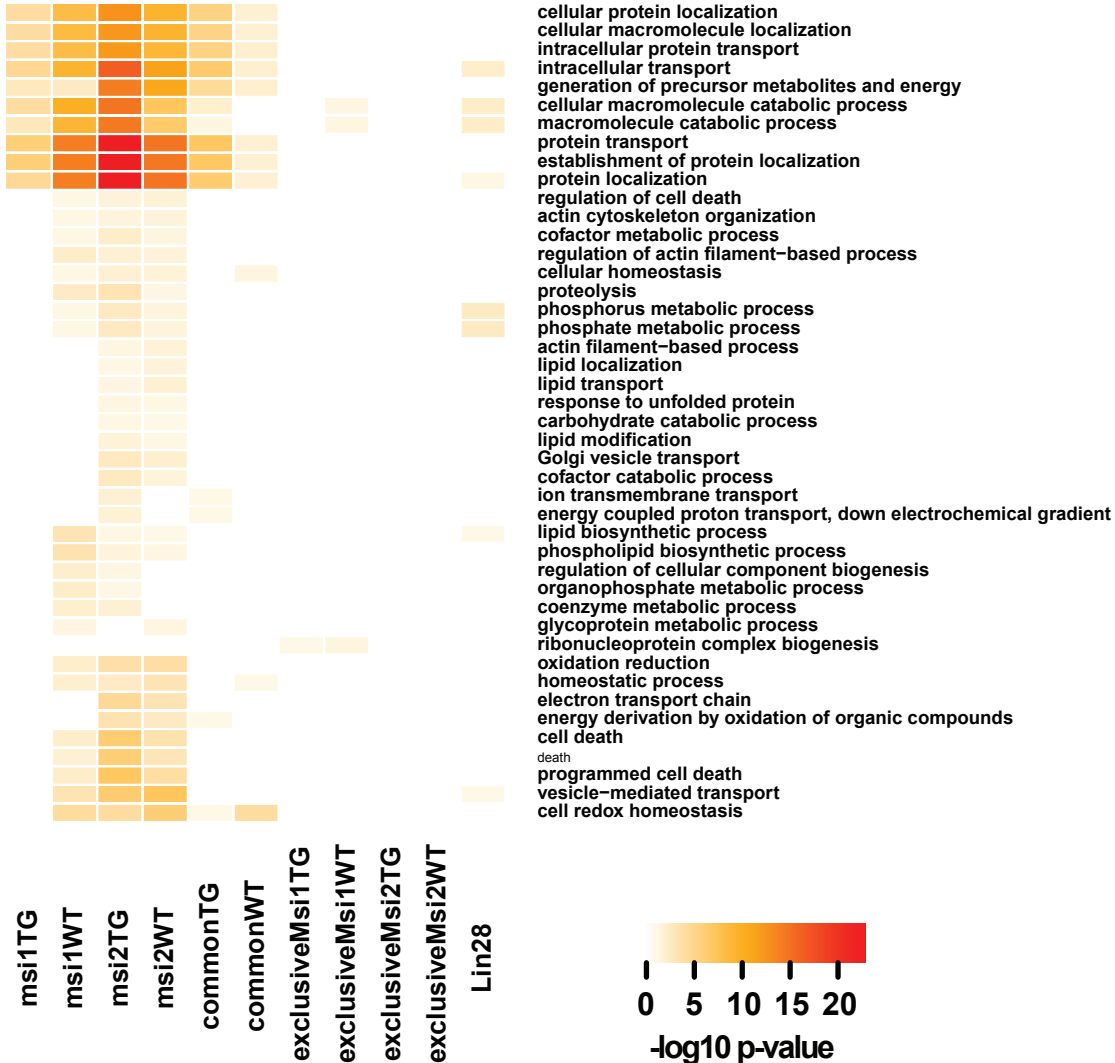

# Molecular Function Term Enrichment

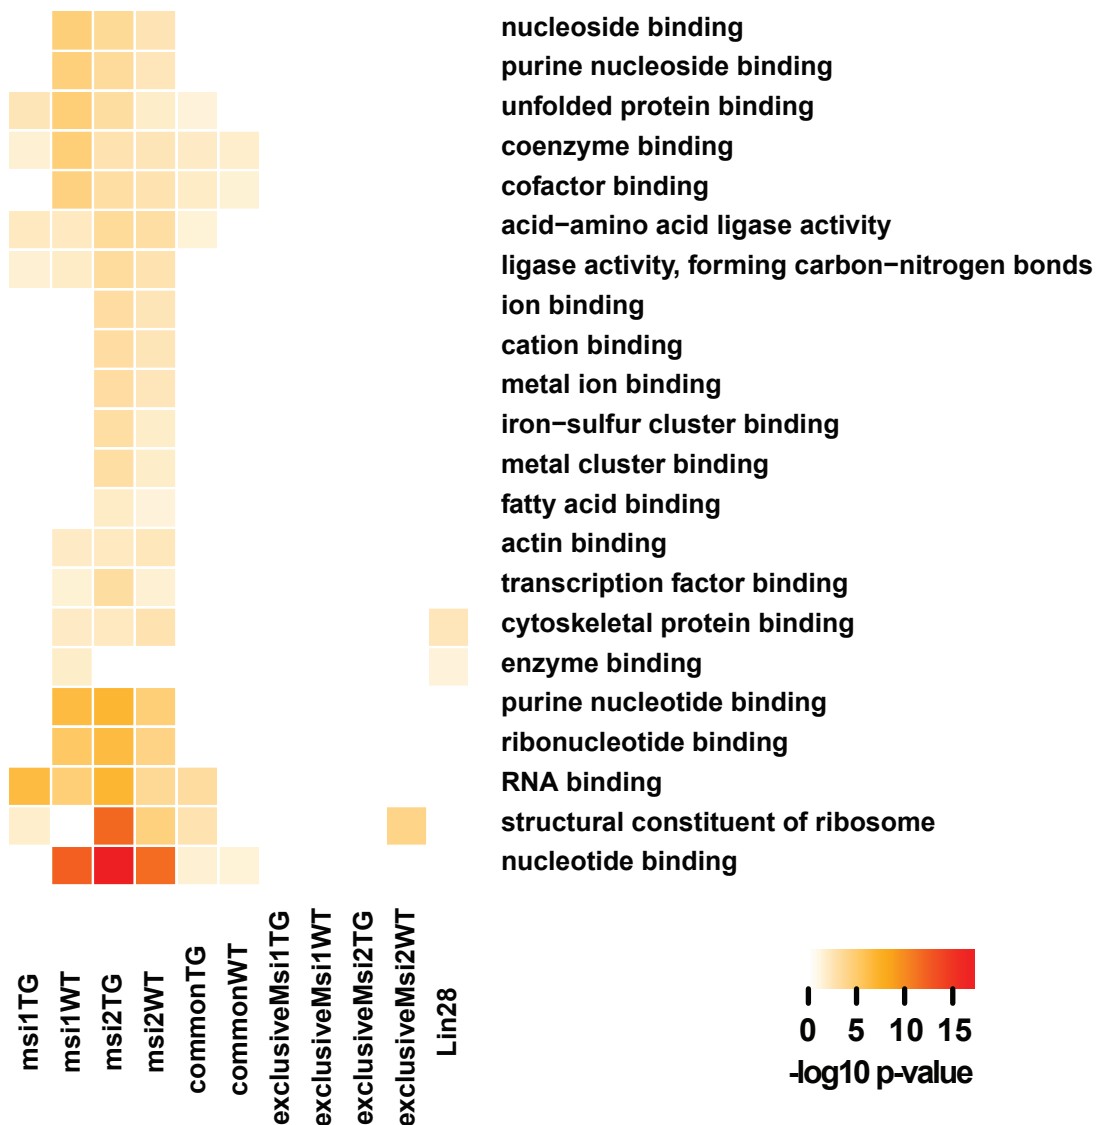

# Cellular Component Term Enrichment

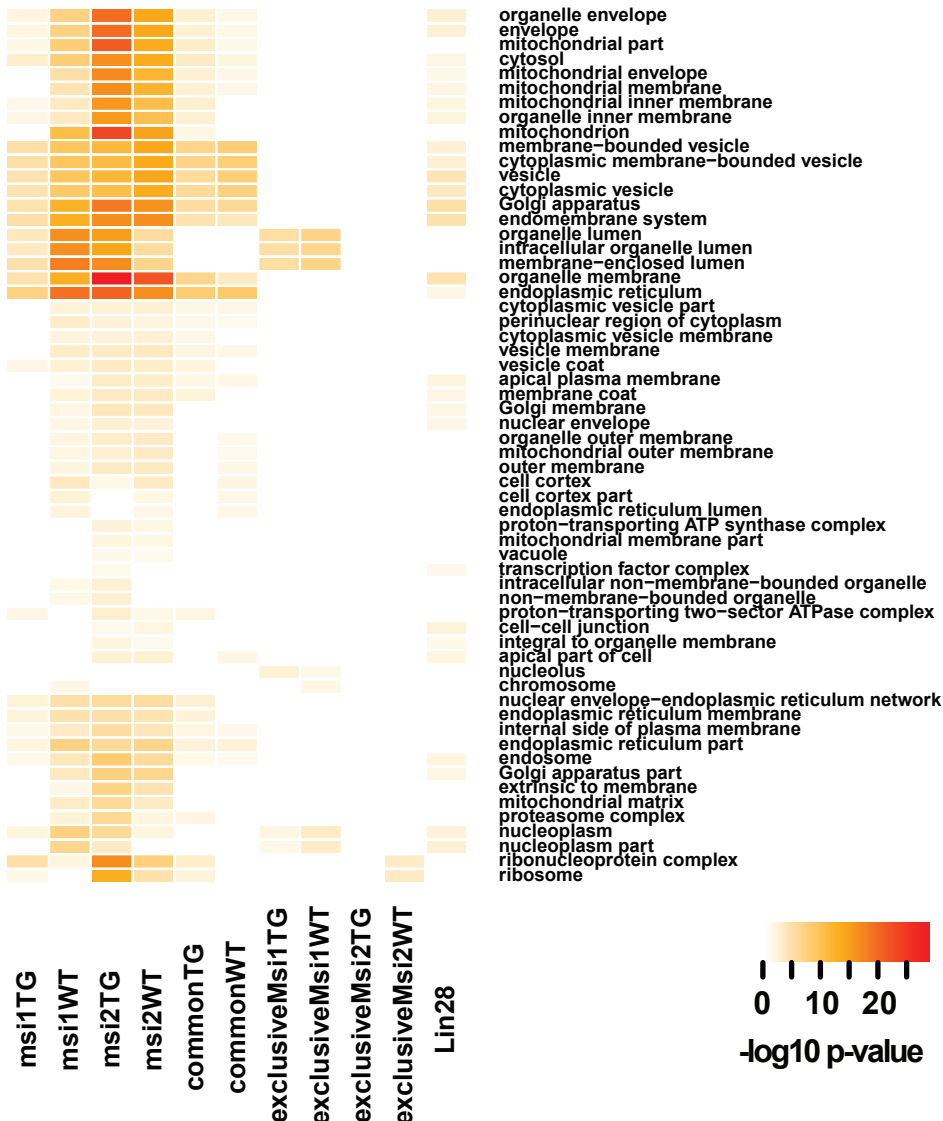

# Biological Process Term Enrichment

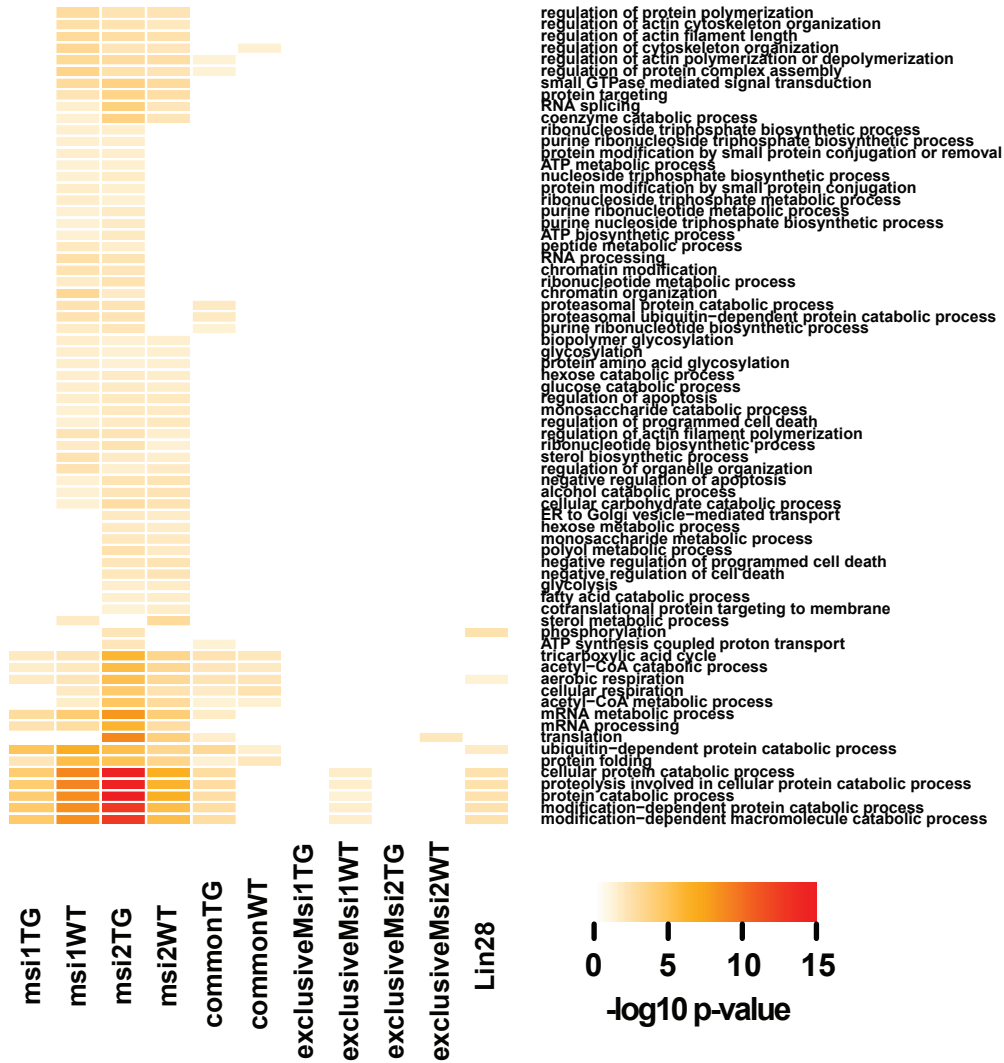

# Molecular Function Term Enrichment

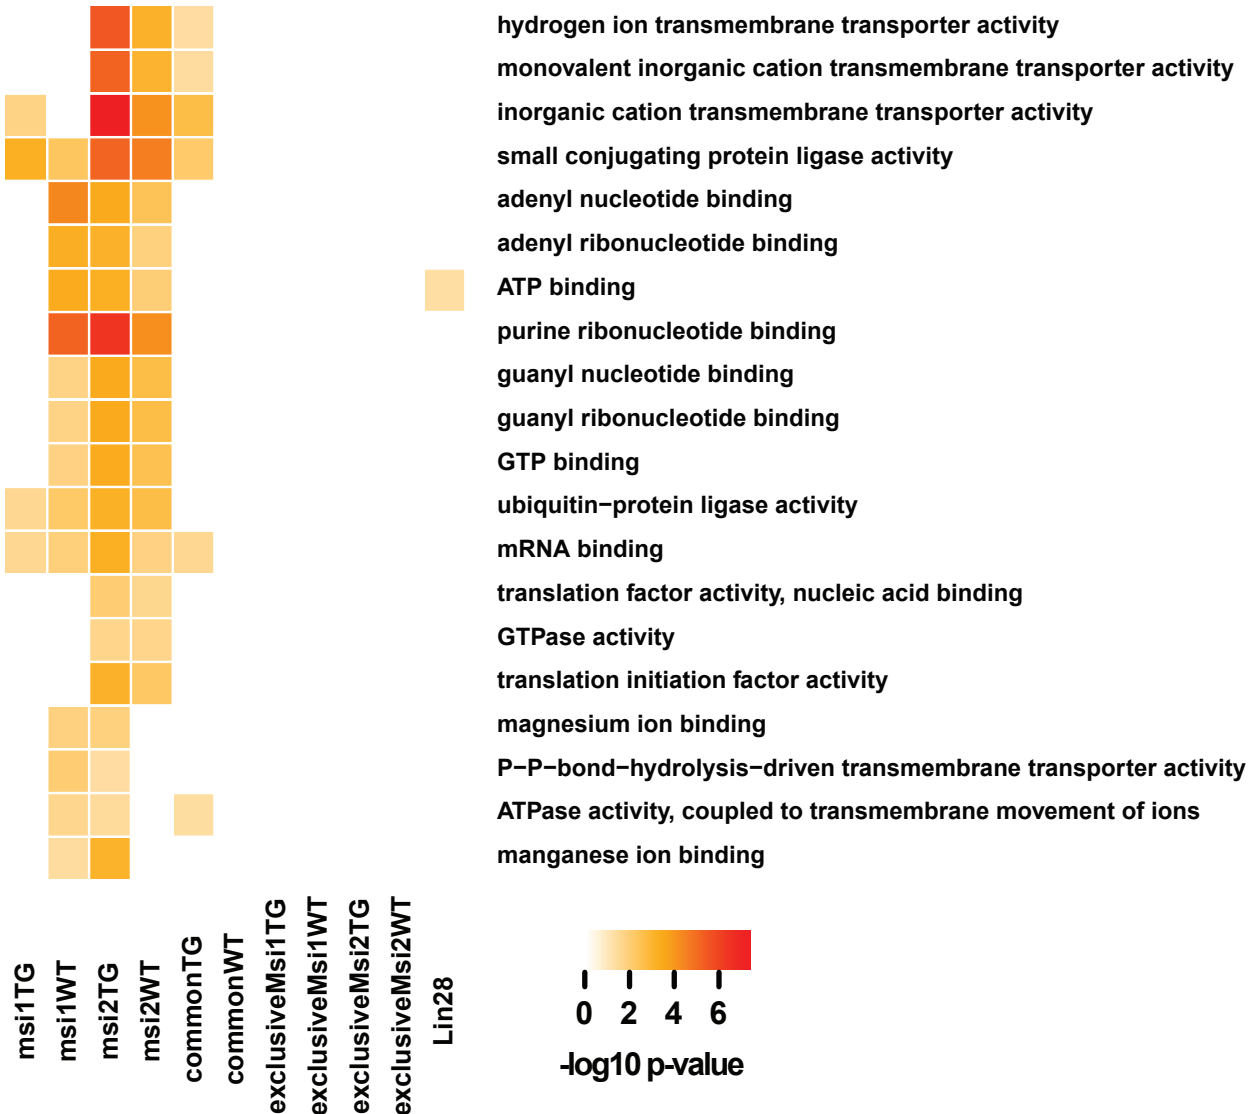

# Cellular Component Term Enrichment

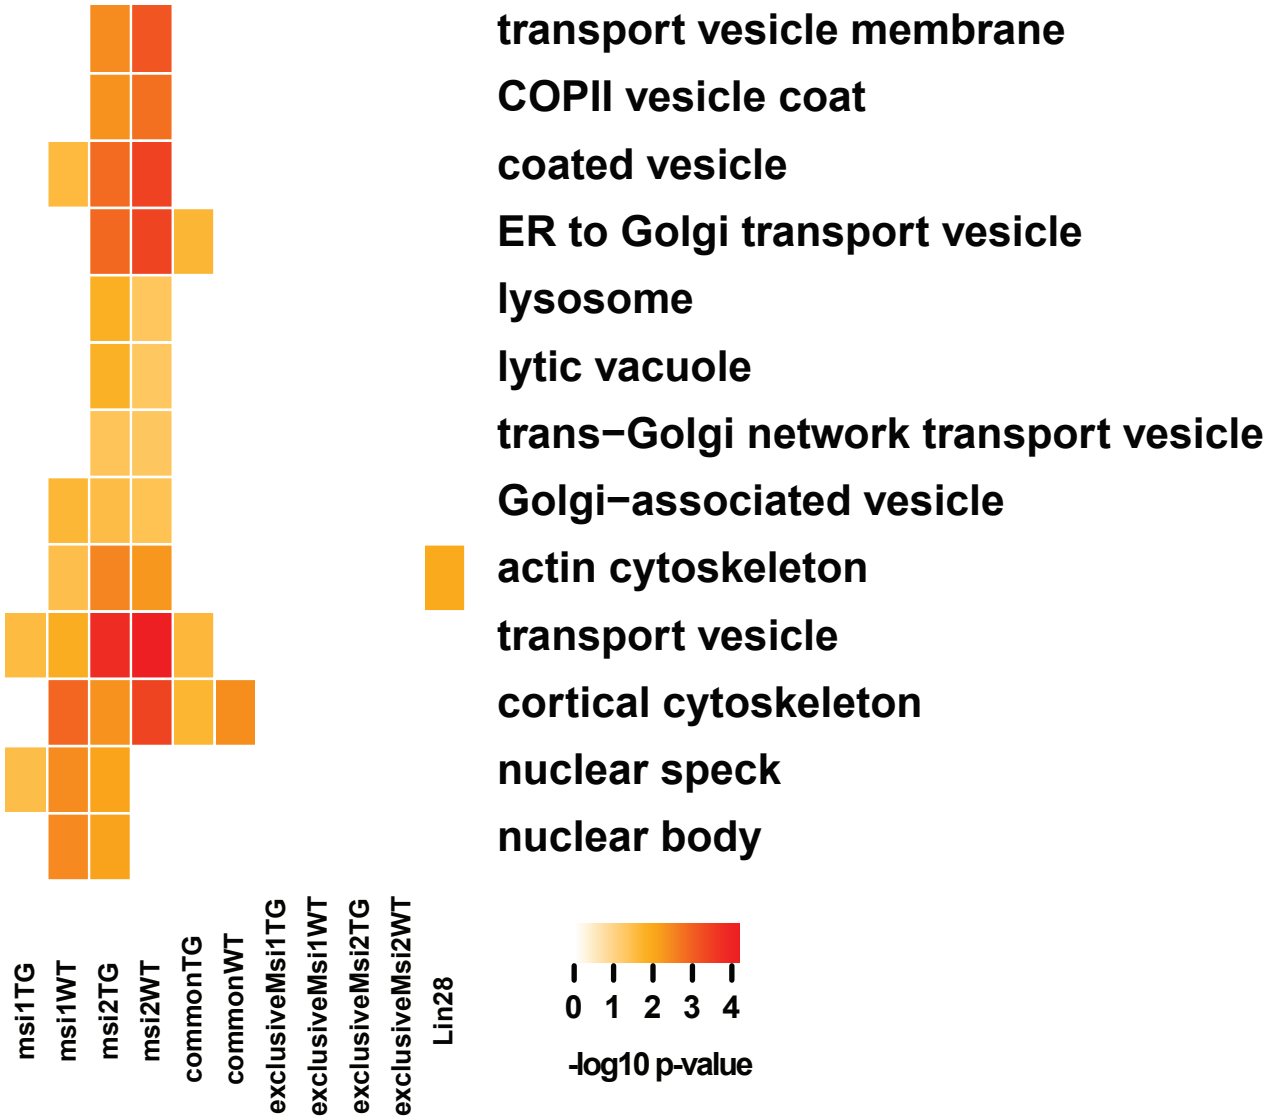

Supplement: NIHMS737574-supplement-7.pdf [file NIHMS737574-supplement-7.pdf]
